# Supplementary material
Source: PubMed Central journal article supplement (PMC6776718)

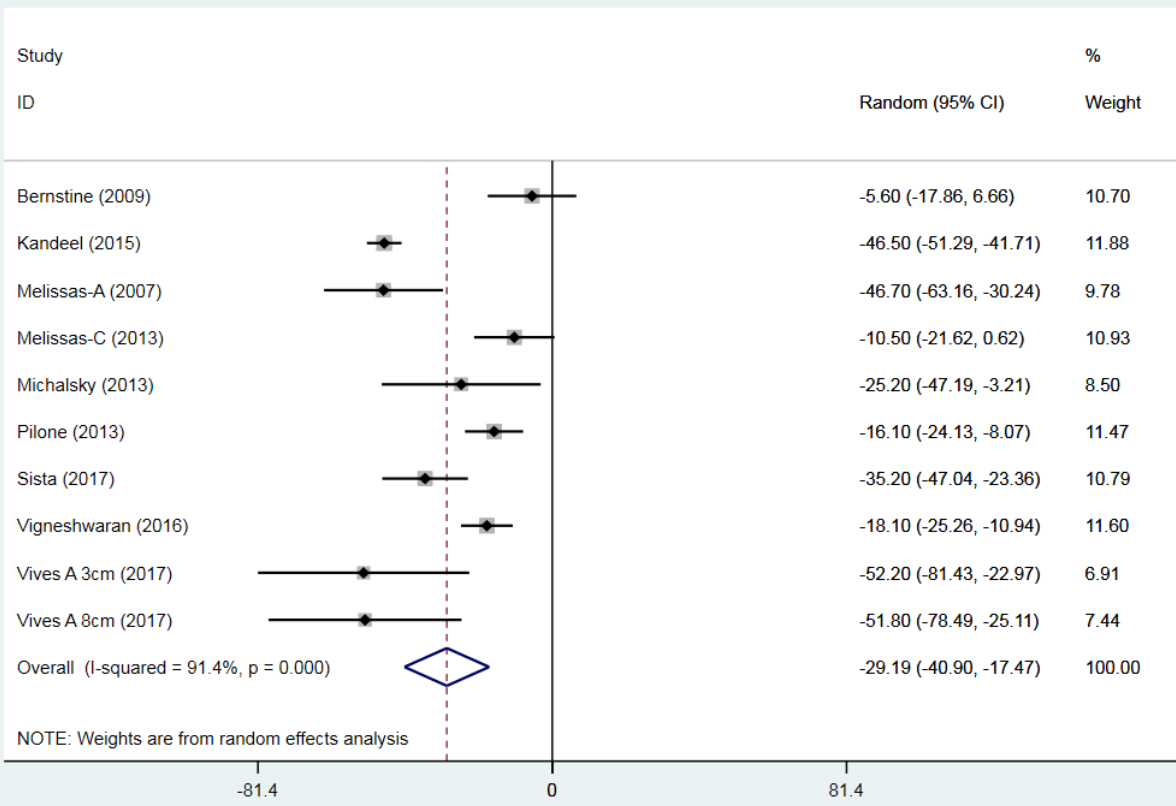

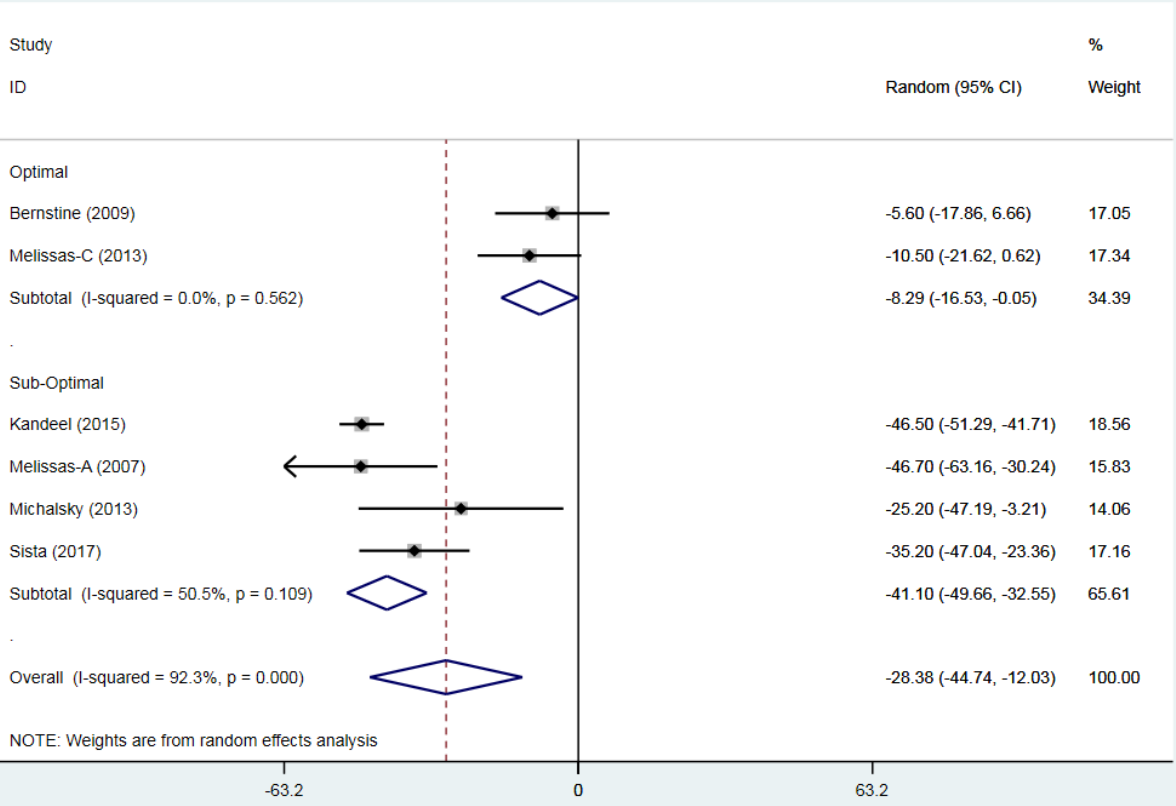

Effect of Baseline GE time on Change after Sleeve Gastrectomy

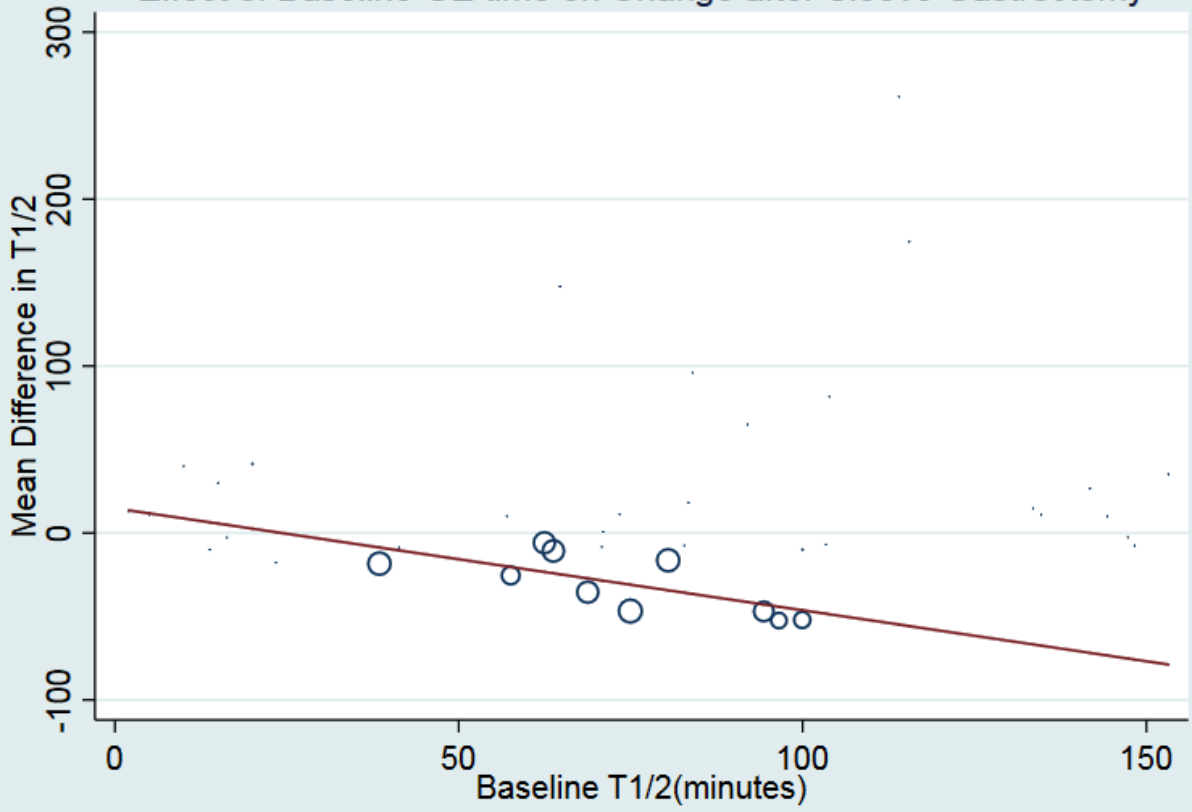

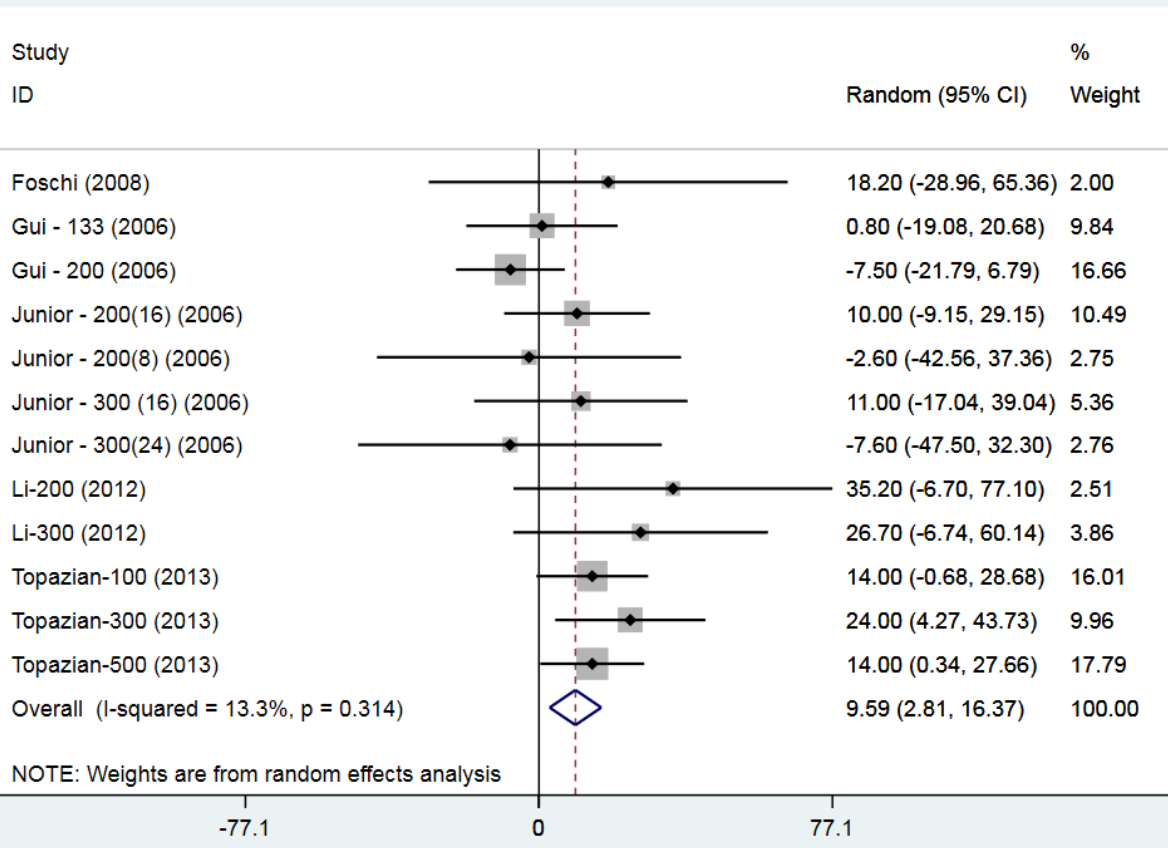

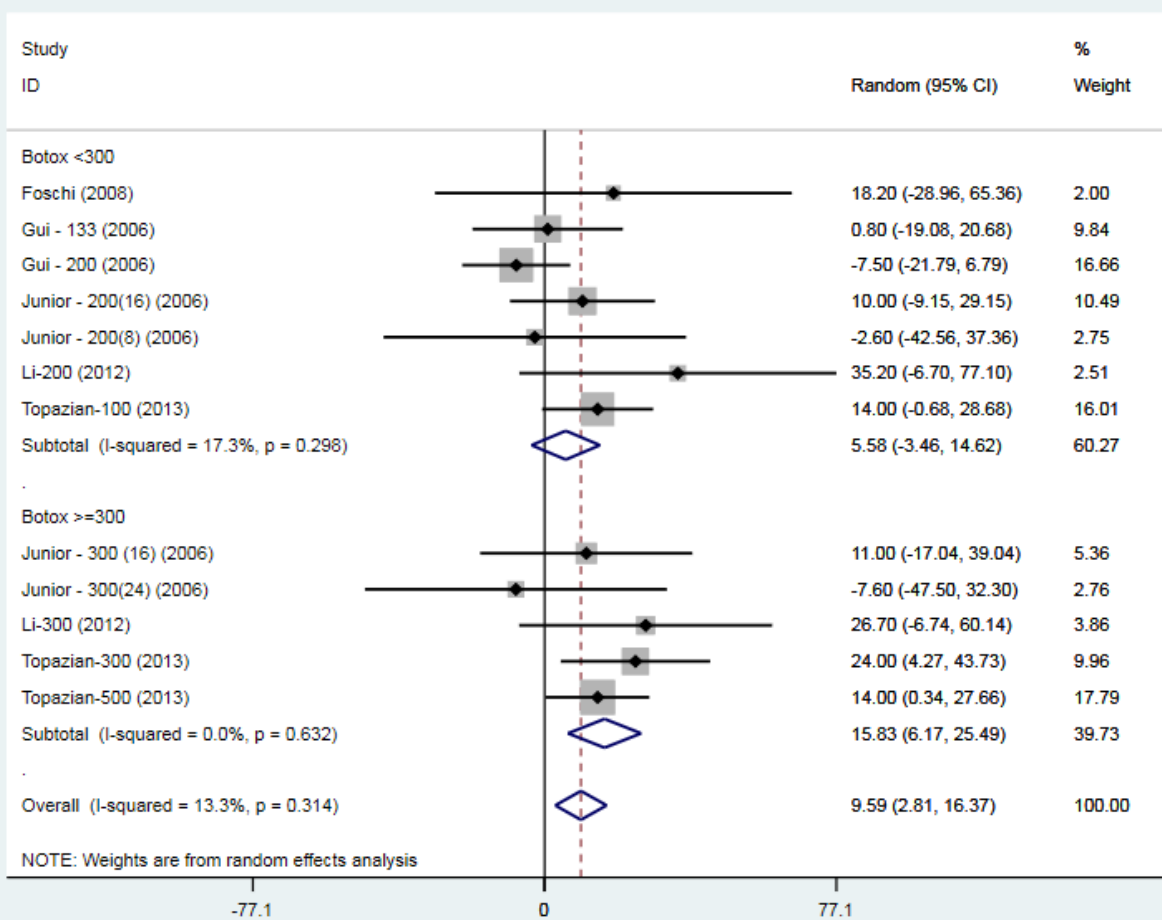

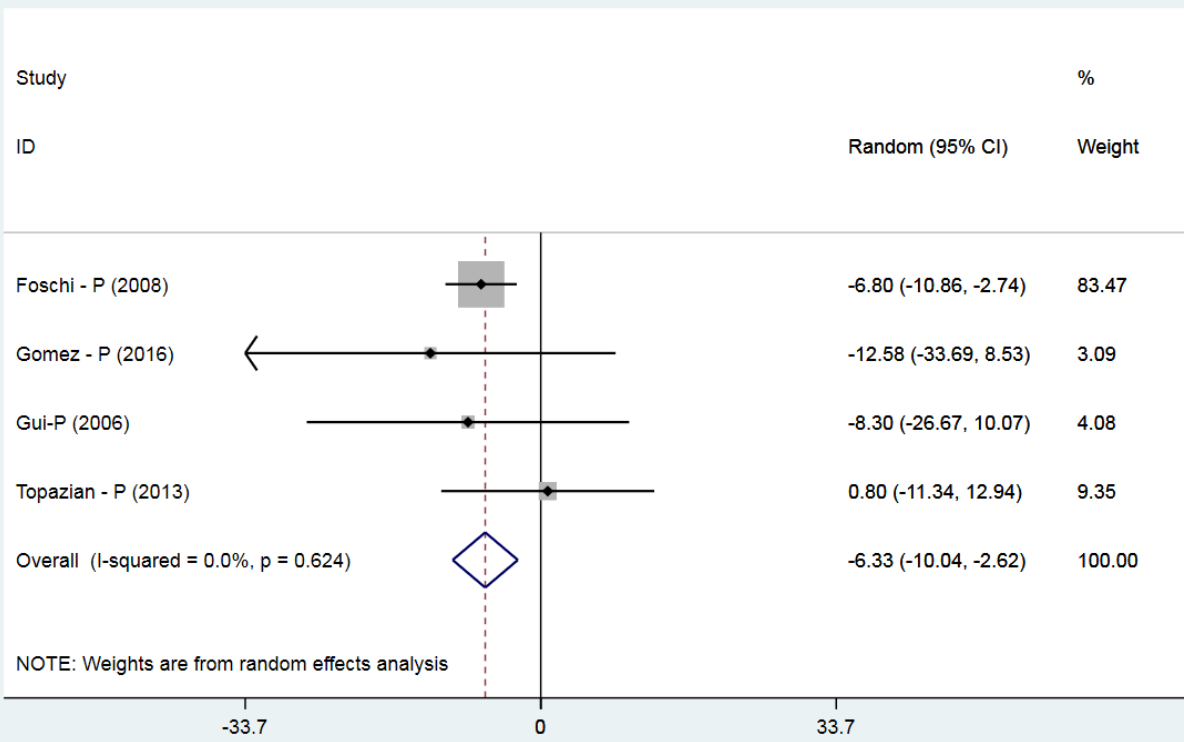

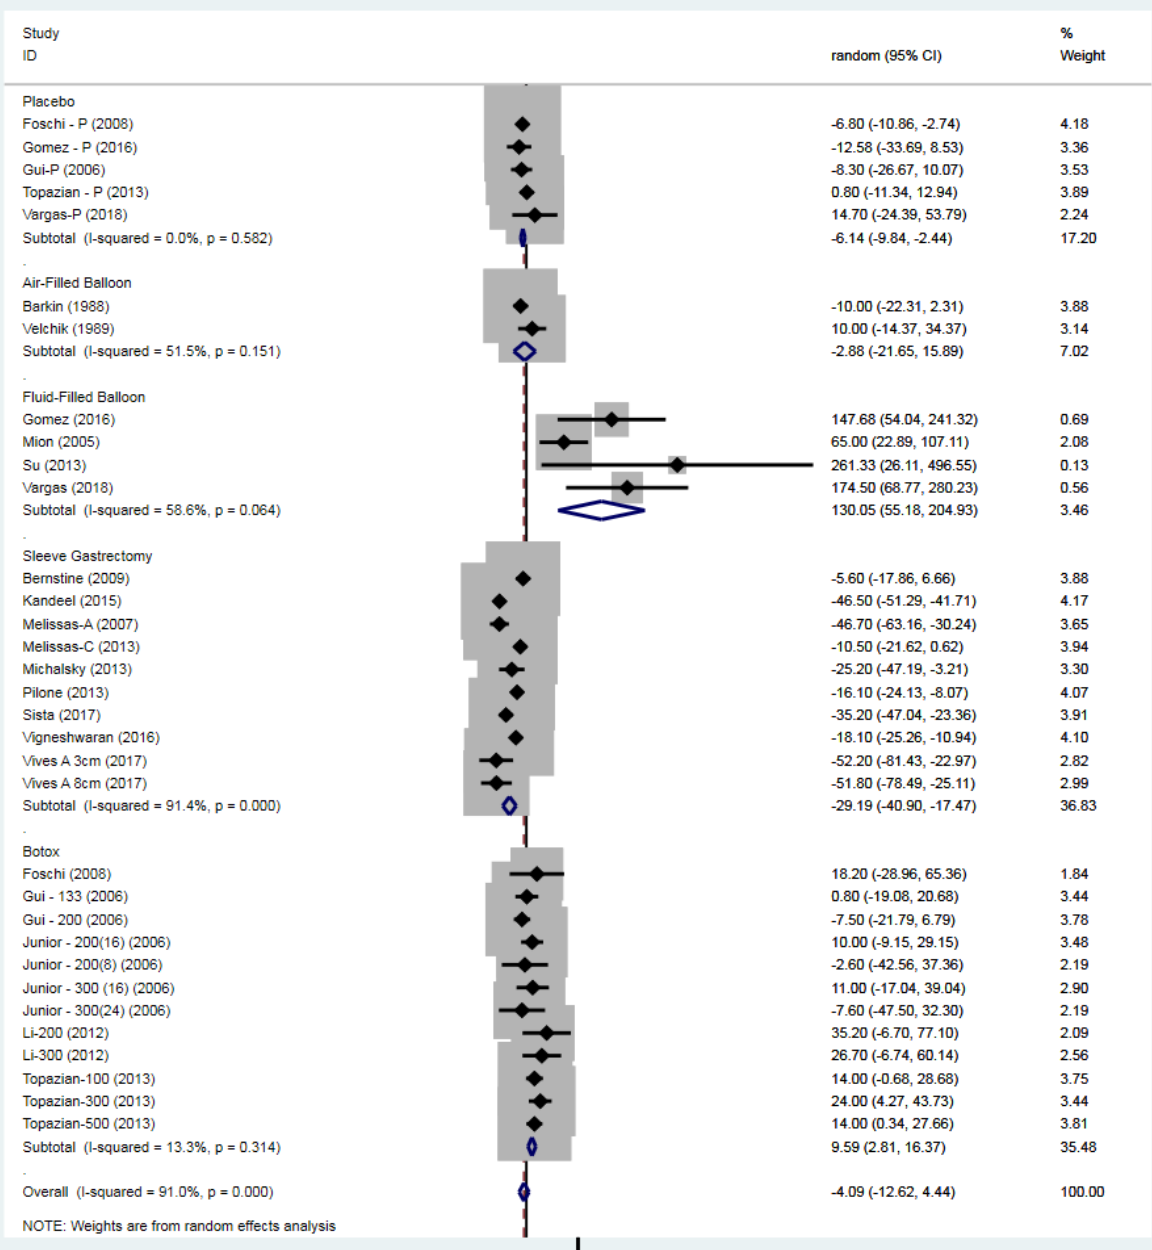

NOTE: Weights are from random effects analysis

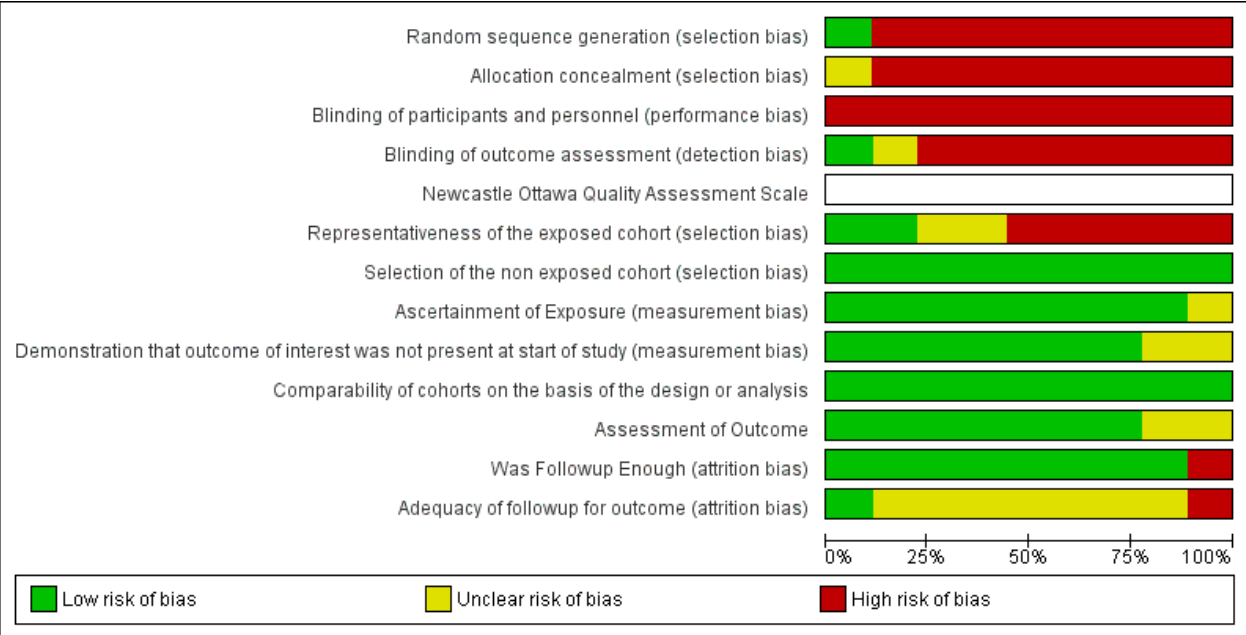



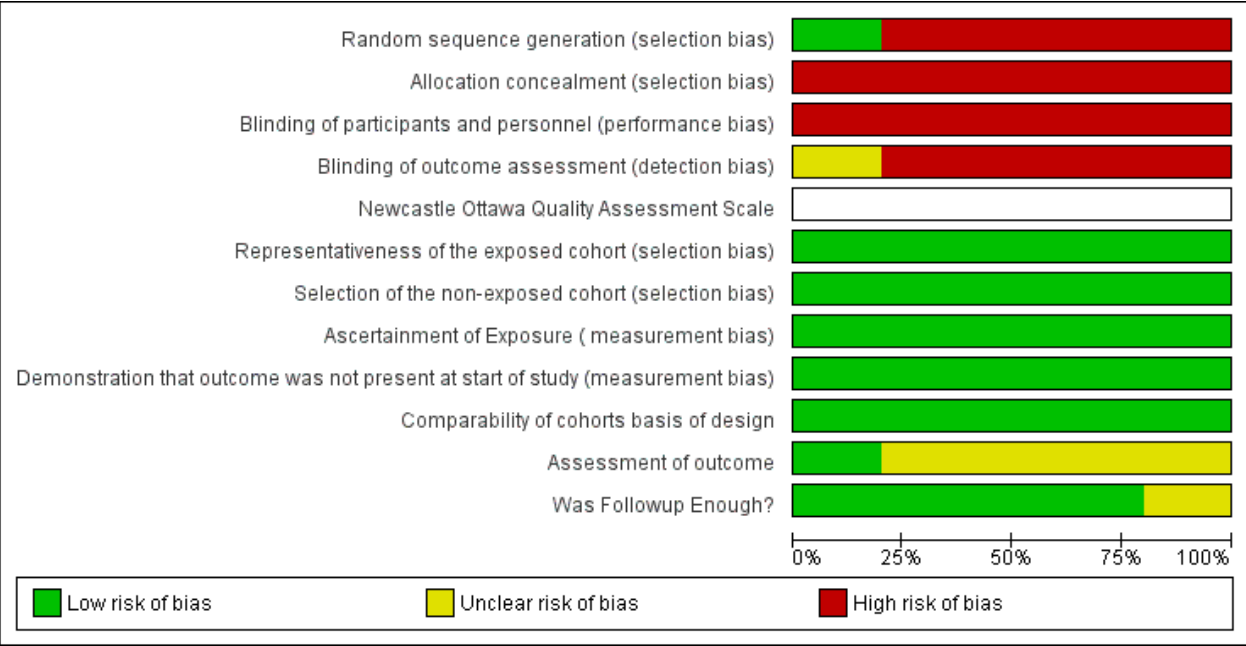

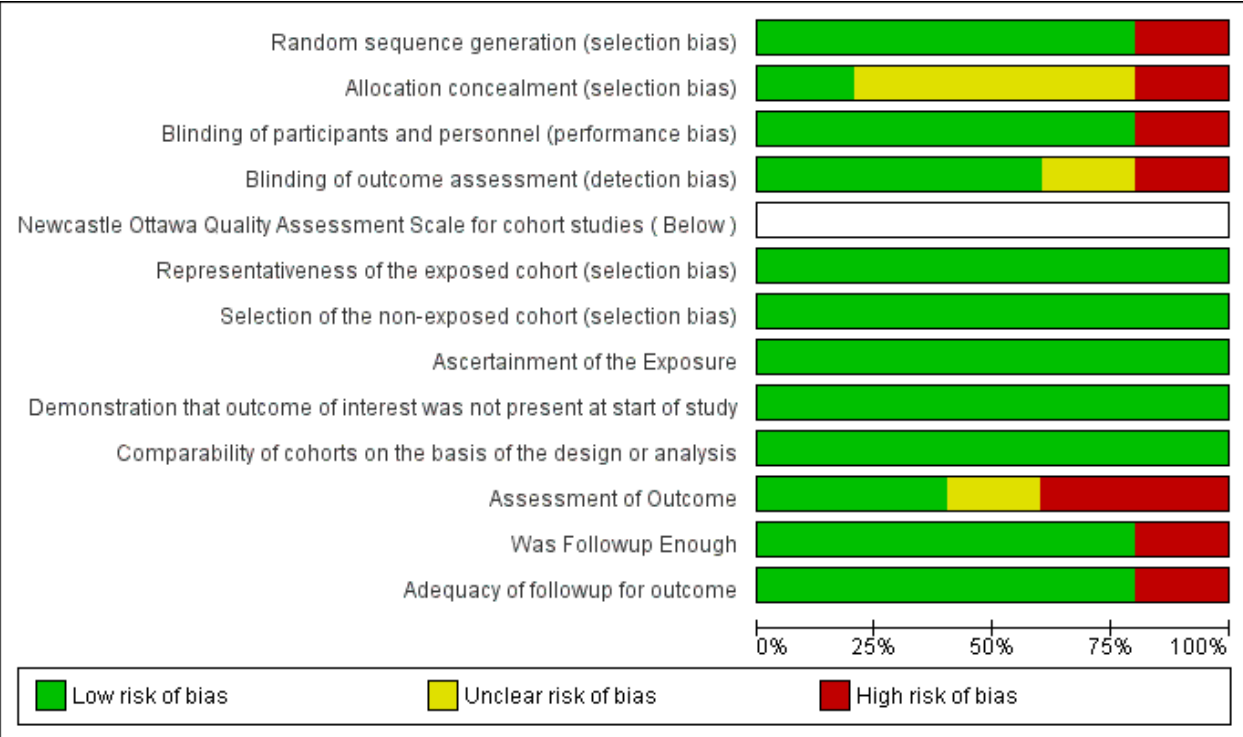

Supplement: NIHMS1526310-supplement-1.pdf [file NIHMS1526310-supplement-1.pdf]
